# Supplementary material for: Pectoral and pelvic girdle rotations during walking and swimming in a semi-aquatic turtle: testing functional role and constraint
Source: Oxford University Press journal article supplement (doi:10.1242/jeb.212688), 2019-01-01
Supplement: jeb212688supp.pdf [file jeb212688supp.pdf]

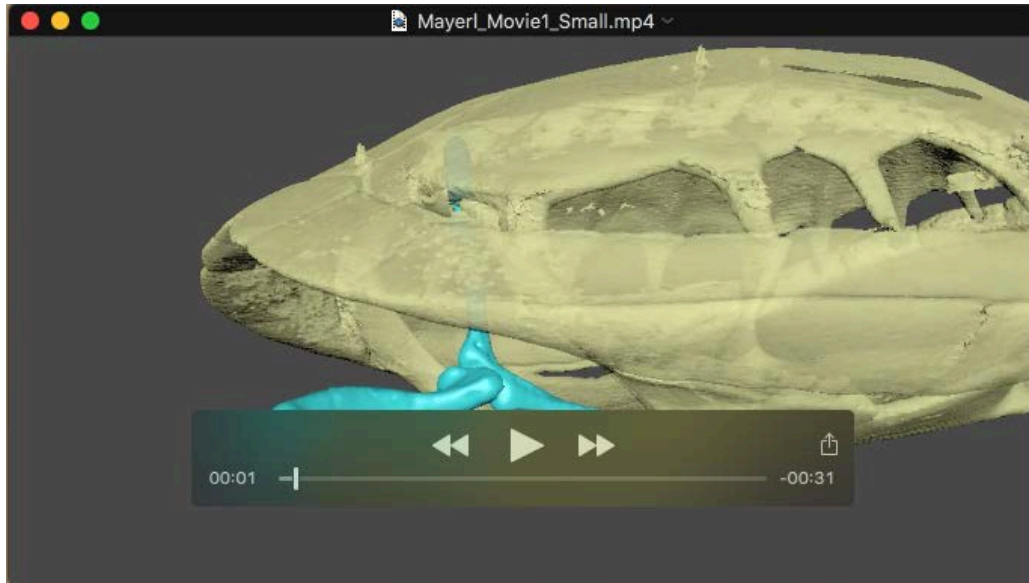

**Movie 1.** XROMM animation of the pectoral girdle and humerus of *Pseudemys concinna* walking from a lateral view (first three steps) and a dorsal view (last three steps).

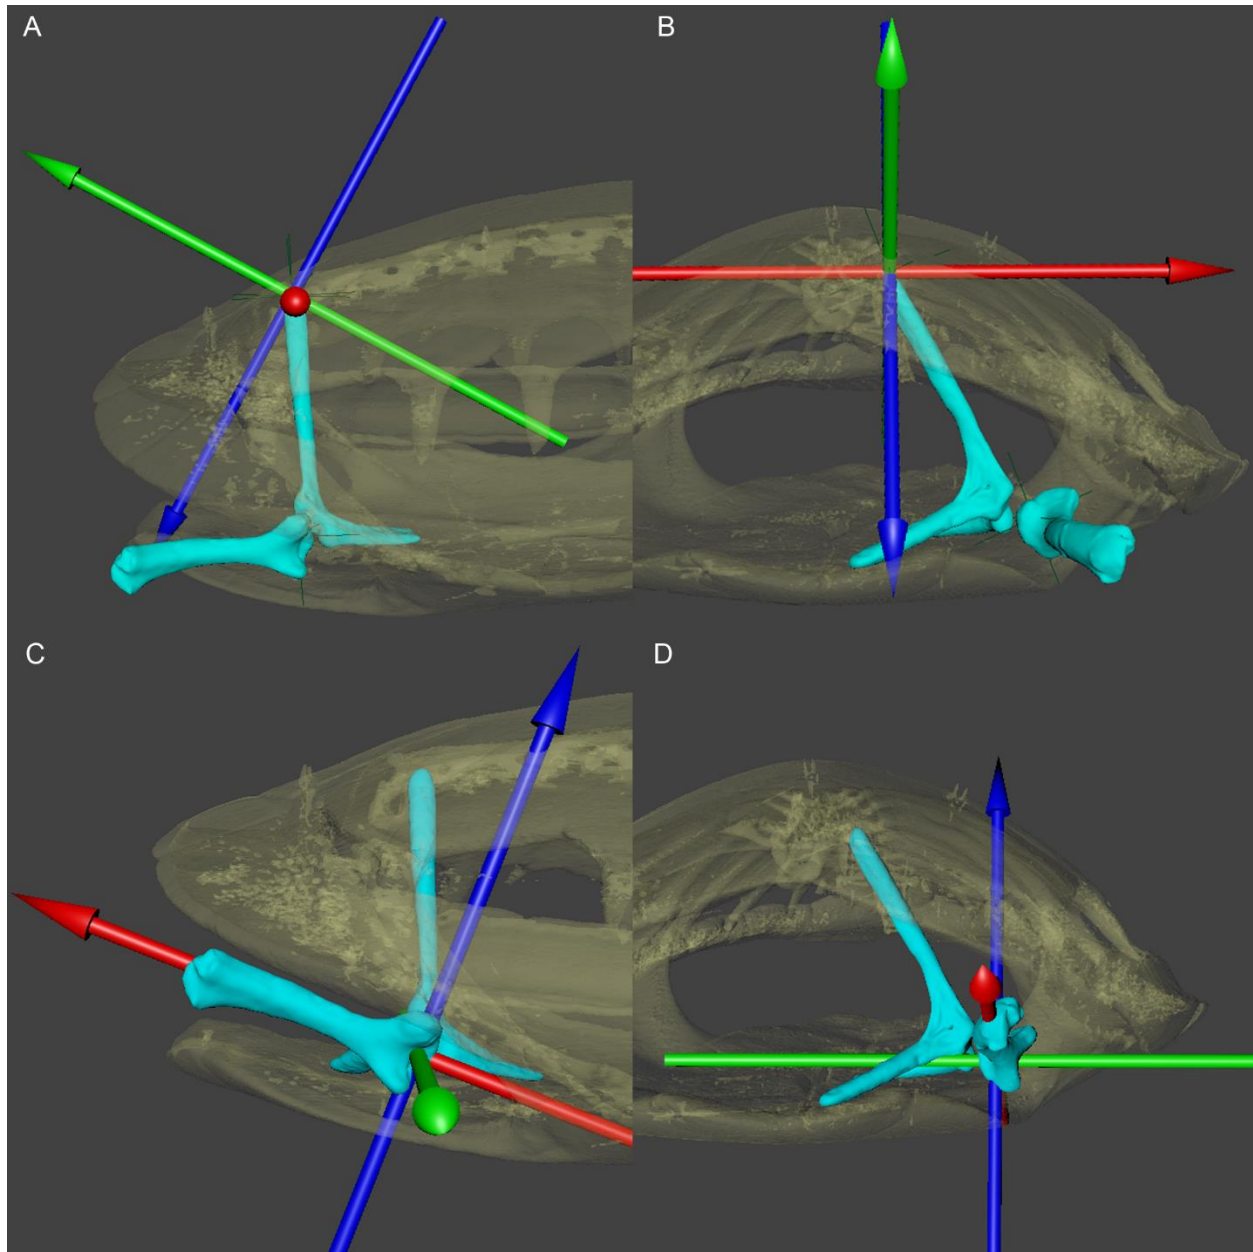

**Figure S1.** Joint coordinate system for the pectoral girdle (A,B) and humerus (C,D) in *Pseudemys concinna* in lateral (left) and anterior (right) views. Axis orientations for the pectoral girdle were set so that rotation about the x axis (red) measures pitch, rotation about the y-axis (green) measures roll, and rotation about the z-axis (blue) measures yaw. Movements of the pectoral girdle were measured relative to the shell. Axis orientations for the humerus were set so that rotation about the x axis (red) measures long-axis rotation, rotation about the y-axis (green) measures abduction/adduction, and rotation about the z-axis (blue) measures protraction/retraction. Movements of the humerus were measured relative to the pectoral girdle.

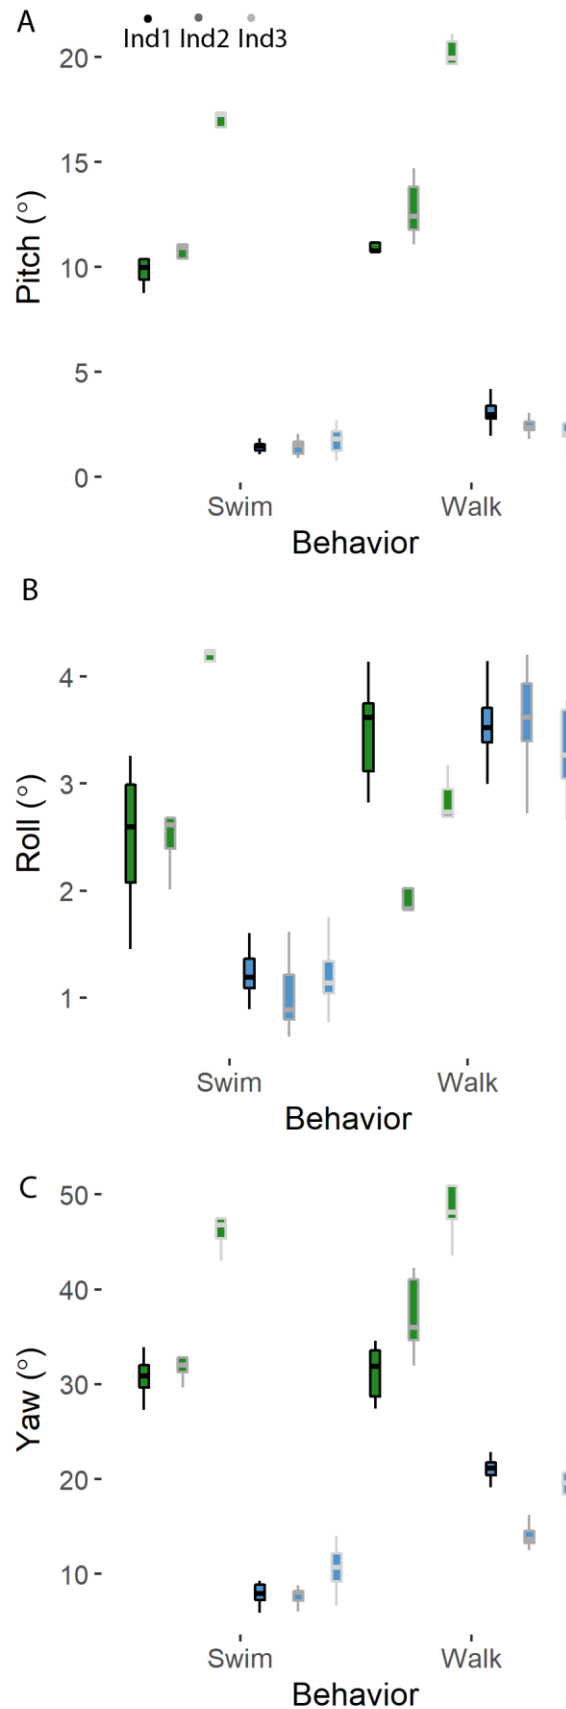

**Figure S2.** Girdle rotations for individual turtles during walking and swimming for pitch (A), roll (B) and yaw (C) movements. Green box and whisker plots indicate shoulder movements; blue box and whisker plots indicate pelvic girdle movements.

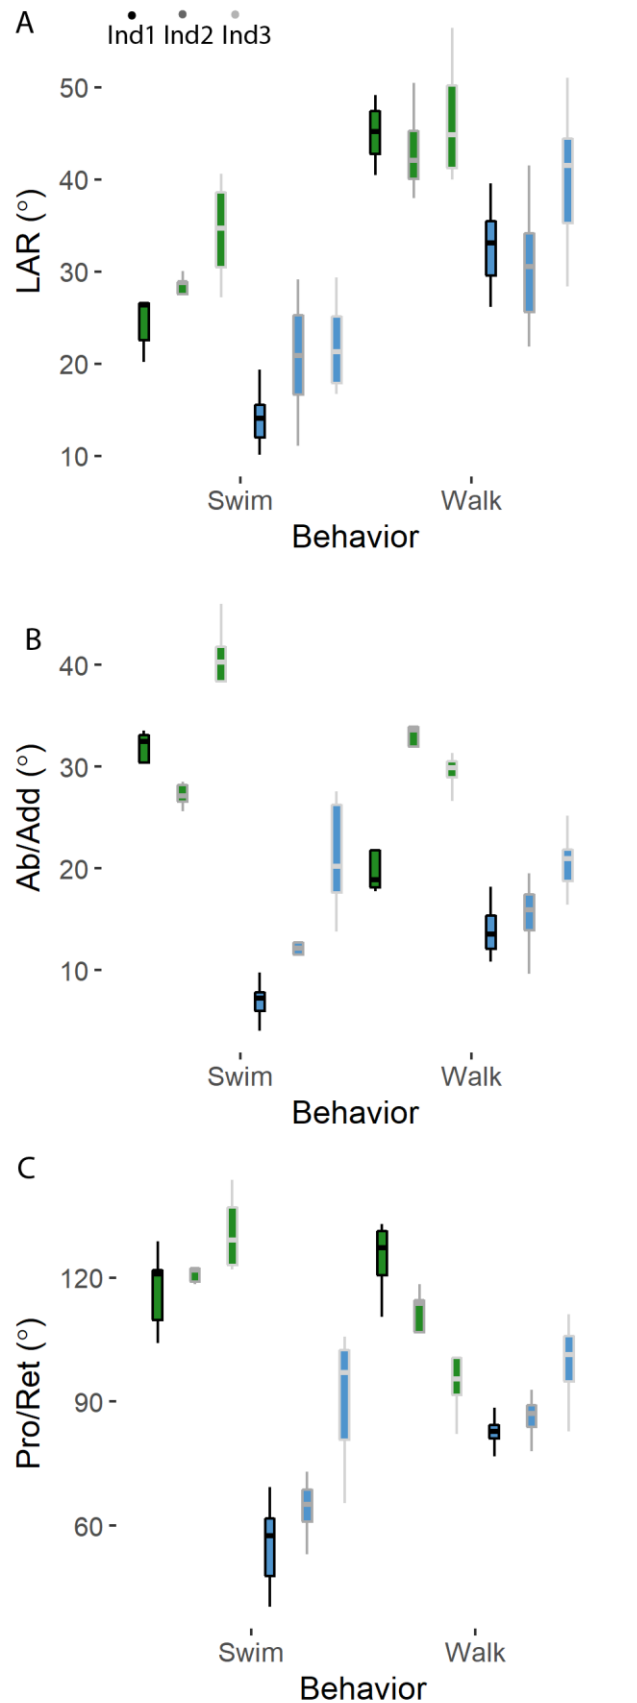

**Figure S3.** Limb rotations for individual turtles during walking and swimming for LAR (A) Abduction/Adduction (B) and Protraction/Retraction (C). Green box and whisker plots indicate humeral movements; blue box and whisker plots indicate femoral movements.

**Table S1.** Tukey's post-hoc analyses for girdle movements in which the behavior \* girdle interaction was significant (N = 107).

|         | Ry, 'roll'              | Rz, 'Yaw'               |
|---------|-------------------------|-------------------------|
|         | (value, p)              |                         |
| SS - PS | <b>1.98, &lt;0.001</b>  | <b>27.64, &lt;0.001</b> |
| SW – PW | -0.34, 0.17             | <b>18.02, &lt;0.001</b> |
| SS – SW | 0.41, 0.19              | -2.64, 0.23             |
| PS - PW | <b>-2.32, &lt;0.001</b> | <b>-9.62, &lt;0.001</b> |

SS: Shoulder movements during swimming; PS: pelvis movements during swims; SW: shoulder movements during walking; PW: pelvis movements during walking

Bolded values indicate statistically significant differences between groups.

**Table S2.** Mean +/- SE Rotational excursion of the humerus and femur during swimming and walking.

|                  | Humerus        |                | Femur         |               | $\Omega^2$  | p-value          |                  |                    |
|------------------|----------------|----------------|---------------|---------------|-------------|------------------|------------------|--------------------|
|                  | Swim           | Walk           | Swim          | Walk          |             | Limb             | Behavior         | Limb *<br>behavior |
|                  | (N = 14)       | (N = 14)       | (N = 30)      | (N = 50)      |             |                  |                  |                    |
| Rx, 'LAR'        | 29.9 ±<br>2.7  | 44.7 ±<br>2.7  | 18.4 ±<br>2.4 | 34.3 ±<br>2.4 | <b>0.74</b> | <b>&lt;0.001</b> | <b>&lt;0.001</b> | 0.67               |
| Ry,<br>'Ab/add'  | 32.6 ±<br>2.9  | 27.8 ±<br>2.9  | 13.2 ±<br>2.8 | 16.5 ±<br>2.8 | <b>0.82</b> | NA               | NA               | <b>&lt;0.001</b>   |
| Rz,<br>'Pro/ret' | 123.6 ±<br>2.9 | 108.3 ±<br>5.9 | 70.4 ±<br>5.5 | 89.6 ±<br>5.3 | <b>0.73</b> | NA               | NA               | <b>&lt;0.001</b>   |

$\Omega^2$ : Measure of effects size of the model (Variable ~ Limb + Behavior + Limb\*Behavior + (1|Turtle))

Bolded values indicate statistically significant differences between groups.

**Table S3.** Tukey's post hoc results on limb rotations for limb movements in which the behavior \* limb interaction was significant (N = 103).

|       | Ry, Add/ab              | Rz, Pro/ret              |
|-------|-------------------------|--------------------------|
| HS-FS | <b>19.41, &lt;0.001</b> | <b>53.21, &lt;0.001</b>  |
| HW-FW | <b>11.30, &lt;0.001</b> | <b>18.70, &lt;0.001</b>  |
| HS-HW | <b>4.82, 0.006</b>      | <b>15.32, 0.004</b>      |
| FS-FW | <b>-3.30, 0.001</b>     | <b>-19.20, &lt;0.001</b> |

HS: Humeral rotations during swimming; HW: humeral rotations during walking; FS: femoral movements during swimming; FW: femoral movements during walking

Bolded values indicate statistically significant differences between groups.
